# Supplementary material for: Competitiveness and Phylogenetic Relationship of Rhizobial Strains with Different Symbiotic Efficiency in Trifolium repens: Conversion of Parasitic into Non-Parasitic Rhizobia by Natural Symbiotic Gene Transfer
Source: MDPI journal article supplement (doi:10.3390/biology12020243), 2023-02-03
Supplement: s1 [file s1]

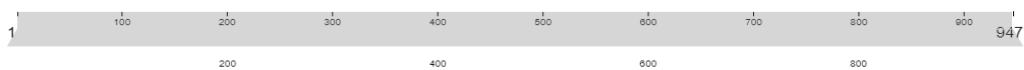

WSM597

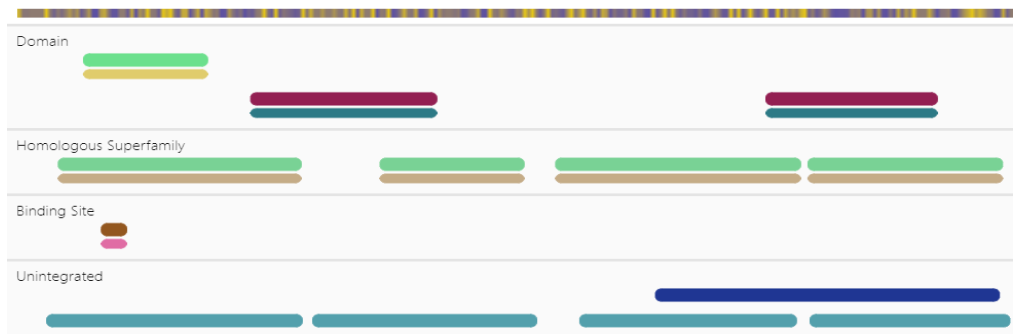

IPR011765: Pept\_M16\_N  
PF00675: Insulinase (Peptidase family M16)

IPR007863: Peptidase\_M16\_C  
PF05193: Peptidase M16 inactive domain

IPR011249: Metalloenz\_LuxS/M16  
SSF63411: LuxS/MPP-like metallohydrolase

IPR001431: Pept\_M16\_Zn\_BS  
PS00143: Insulinase family, Zinc-binding region si

PTHR43690: NARDILYSIN  
G3DSA:3.30.830.10:

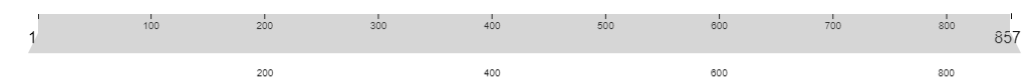

U268\_1

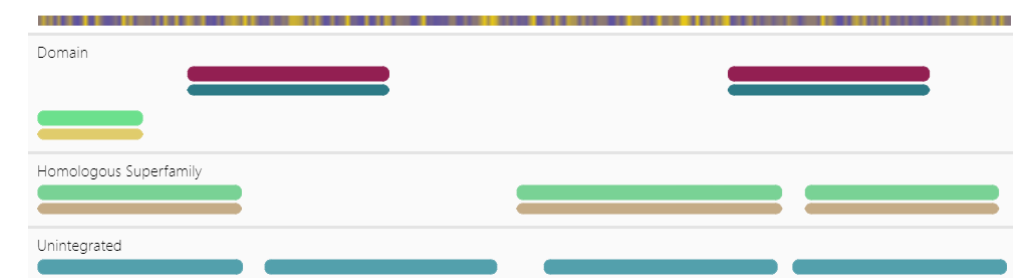

IPR007863: Peptidase\_M16\_C  
PF05193: Peptidase M16 inactive domain

IPR011765: Pept\_M16\_N  
PF00675: Insulinase (Peptidase family M16)

IPR011249: Metalloenz\_LuxS/M16  
SSF63411: LuxS/MPP-like metallohydrolase

G3DSA:3.30.830.10:

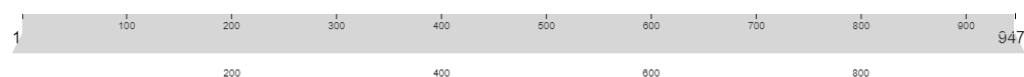

U268\_2

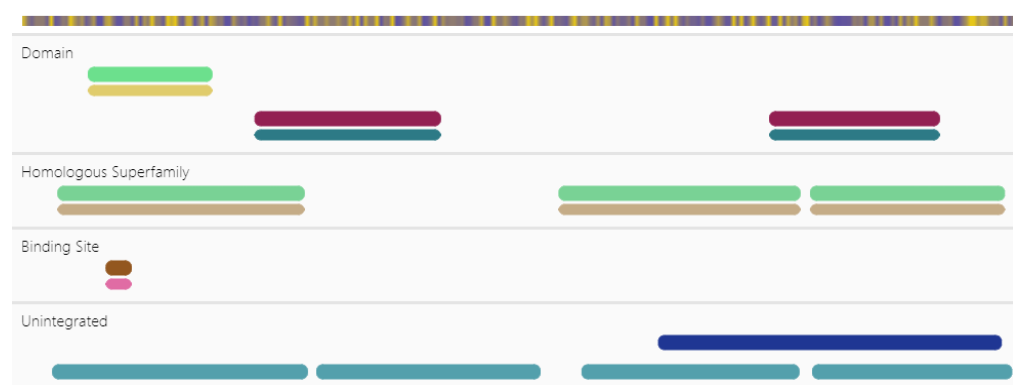

IPR011765: Pept\_M16\_N  
PF00675: Insulinase (Peptidase family M16)

IPR007863: Peptidase\_M16\_C  
PF05193: Peptidase M16 inactive domain

IPR011249: Metalloenz\_LuxS/M16  
SSF63411: LuxS/MPP-like metallohydrolase

IPR001431: Pept\_M16\_Zn\_BS  
PS00143: Insulinase family, Zinc-binding region s

PTHR43690: NARDILYSIN  
G3DSA:3.30.830.10:

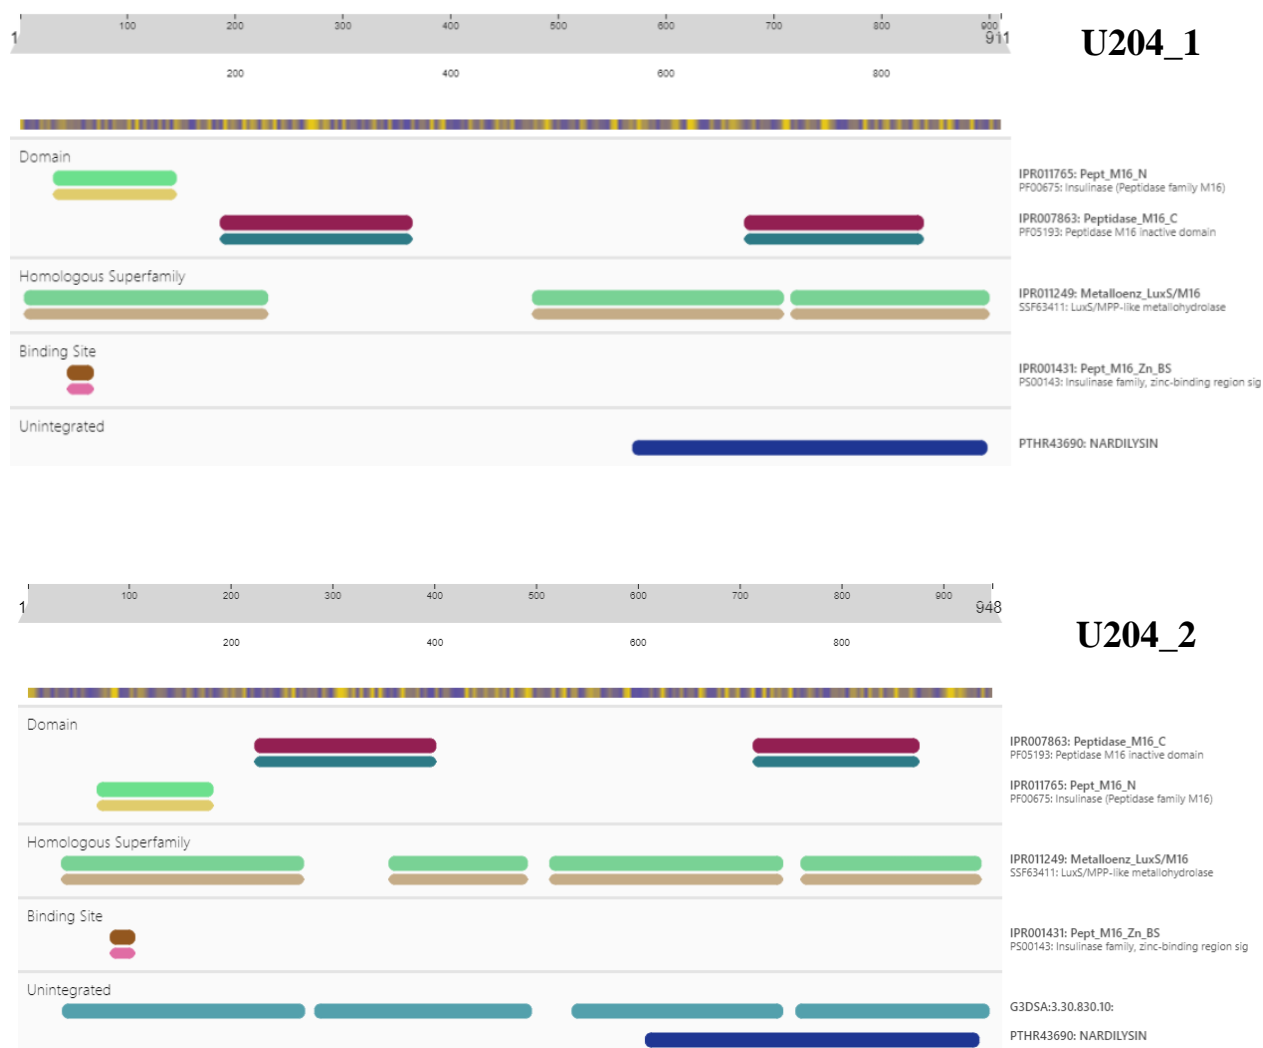

**Figure S5.** Graphical view of The InterPro search and protein classification of M16 peptidase sequences found in the genome of strains U268, U204 and WSM 597 using InterPro database. The InterPro entry was the aminoacidic sequence for the putative M16 peptidases. In the graphical view, matches to the InterPro databases and the relevant positions of these matches on the query sequence are displayed.
