# Supplementary material for: Competitiveness and Phylogenetic Relationship of Rhizobial Strains with Different Symbiotic Efficiency in Trifolium repens: Conversion of Parasitic into Non-Parasitic Rhizobia by Natural Symbiotic Gene Transfer
Source: Biology (Basel). 2023 Feb 3;12(2):243. doi: 10.3390/biology12020243 (PMC9953144; doi:10.3390/biology12020243)
Supplement: Supplementary file 1 [file biology-12-00243-s001.zip]

Archive with 7 entries (7 files):
- Figure S1.png
- Figure S2.jpg
- Figure S3.jpg
- Figure S4.jpg
- Figure S5.pdf
- Table S1.xlsx
- Table S2.xlsx
