# Supplementary material for: Competitiveness and Phylogenetic Relationship of Rhizobial Strains with Different Symbiotic Efficiency in Trifolium repens: Conversion of Parasitic into Non-Parasitic Rhizobia by Natural Symbiotic Gene Transfer
Source: Biology (Basel). 2023 Feb 3;12(2):243. doi: 10.3390/biology12020243 (PMC9953144; doi:10.3390/biology12020243)
Supplement: Supplementary file 1 [file biology-12-00243-s001.zip › Table S1.xlsx]

## Sheet: ANIb U204
ANIb calculation with JSpecies (https://jspecies.ribohost.com/jspeciesws)
Genome	ANIb [%]	Aligned [%]	Aligned [bp]	Total [bp]
Rhizobium leguminosarum bv. viciae USDA 2370 [T]	96.92	83.05	6391476	7696166
Rhizobium indicum JKLM 12A2 [T]	91.78	72.28	5562480	7696166
Rhizobium leguminosarum bv. trifolii WSM1325	91.67	72.48	5577857	7696166
Rhizobium sophorae CCBAU 03386 [T]	91.07	71.58	5508672	7696166
Rhizobium laguerreae FB206 [T]	90.80	69.18	5323989	7696166
Rhizobium anhuiense CCBAU 23252 [T]	90.10	71.68	5516285	7696166
Rhizobium redzepovicii 18T [T]	87.36	66.23	5096950	7696166
Rhizobium leguminosarum bv. trifolii WSM2304	87.13	64.48	4962379	7696166
Rhizobium leguminosarum bv. trifolii WSM597	87.10	65.60	5048579	7696166
Rhizobium acidisoli FH23	87.08	64.90	4994518	7696166
Rhizobium hidalgonense FH14 [T]	86.85	65.17	5015623	7696166
Rhizobium pisi DSM 30132 [T]	86.84	63.85	4913876	7696166
Rhizobium fabae CCBAU 33202 [T]	86.79	63.04	4851873	7696166
Rhizobium phaseoli ATCC 14482 [T]	85.54	61.31	4718244	7696166
Rhizobium etli CFN 42 [T]	85.16	61.00	4694981	7696166
Rhizobium favelukesii LPU83 [T]	77.60	50.17	3861508	7696166
Rhizobium tibeticum CGMCC 1.7071 [T]	77.49	49.74	3827979	7696166
Rhizobium grahamii CCGE 502 [T]	76.81	47.69	3670565	7696166
Rhizobium lusitanum P1-7 [T]	76.12	46.19	3555081	7696166
Rhizobium freirei PRF 81 [T]	75.91	43.14	3320452	7696166
Rhizobium miluonense HAMBI 2971 [T]	75.78	43.02	3310808	7696166
Rhizobium tropici CIAT 899 [T]	75.53	43.74	3366414	7696166
Rhizobium pusense NRCPB10 [T]	72.63	32.96	2536309	7696166
#ANIb Summary for contigsU204.fa

## Sheet: ANIm U204
ANIm calculation with JSpecies (https://jspecies.ribohost.com/jspeciesws)
Genome	ANIm [%]	Aligned [%]	Aligned [bp]	Total [bp]
Rhizobium leguminosarum bv. viciae USDA 2370 [T]	97.78	83.28	6409406	7696166
Rhizobium indicum JKLM 12A2 [T]	93.05	74.37	5723521	7696166
Rhizobium leguminosarum bv. trifolii WSM1325	93.04	73.96	5691809	7696166
Rhizobium sophorae CCBAU 03386 [T]	92.50	72.87	5607902	7696166
Rhizobium laguerreae FB206 [T]	92.40	70.46	5422863	7696166
Rhizobium anhuiense CCBAU 23252 [T]	91.51	72.97	5615832	7696166
Rhizobium redzepovicii 18T [T]	89.43	65.63	5050740	7696166
Rhizobium acidisoli FH23	89.37	64.04	4928286	7696166
Rhizobium leguminosarum bv. trifolii WSM597	89.33	64.68	4977884	7696166
Rhizobium leguminosarum bv. trifolii WSM2304	89.32	64.01	4926040	7696166
Rhizobium hidalgonense FH14 [T]	89.18	63.87	4915682	7696166
Rhizobium fabae CCBAU 33202 [T]	89.01	61.86	4761199	7696166
Rhizobium pisi DSM 30132 [T]	89.01	62.73	4827981	7696166
Rhizobium phaseoli ATCC 14482 [T]	88.28	58.16	4476079	7696166
Rhizobium etli CFN 42 [T]	87.95	57.30	4409906	7696166
Rhizobium tibeticum CGMCC 1.7071 [T]	84.90	22.72	1748410	7696166
Rhizobium favelukesii LPU83 [T]	84.87	23.00	1770228	7696166
Rhizobium freirei PRF 81 [T]	84.68	17.46	1343492	7696166
Rhizobium lusitanum P1-7 [T]	84.62	19.12	1471385	7696166
Rhizobium miluonense HAMBI 2971 [T]	84.54	16.76	1289927	7696166
Rhizobium tropici CIAT 899 [T]	84.43	16.66	1281989	7696166
Rhizobium grahamii CCGE 502 [T]	84.33	20.86	1605291	7696166
Rhizobium pusense NRCPB10 [T]	83.87	7.10	546200	7696166
#ANIm Summary for contigsU204.fa

## Sheet: tetra U204
Statistical analisys of tetranucleotide pattern usage with Jspecies (https://jspecies.ribohost.com/jspeciesws)
Genome	z-score
Rhizobium leguminosarum bv. viciae USDA 2370 [T]	0.99971
Rhizobium indicum JKLM 12A2 [T]	0.99944
Rhizobium sophorae CCBAU 03386 [T]	0.99941
Rhizobium leguminosarum bv. trifolii WSM1325	0.99932
Rhizobium laguerreae FB206 [T]	0.99927
Rhizobium anhuiense CCBAU 23252 [T]	0.99854
Rhizobium hidalgonense FH14 [T]	0.99801
Rhizobium pisi DSM 30132 [T]	0.99751
Rhizobium fabae CCBAU 33202 [T]	0.99735
Rhizobium leguminosarum bv. trifolii WSM597	0.99725
Rhizobium redzepovicii 18T [T]	0.99721
Rhizobium acidisoli FH23	0.99694
Rhizobium leguminosarum bv. trifolii WSM2304	0.99691
Rhizobium etli CFN 42 [T]	0.99687
Rhizobium phaseoli ATCC 14482 [T]	0.99645
Rhizobium lusitanum P1-7 [T]	0.98901
Rhizobium freirei PRF 81 [T]	0.9864
Rhizobium miluonense HAMBI 2971 [T]	0.98444
Rhizobium tropici CIAT 899 [T]	0.98268
Rhizobium tibeticum CGMCC 1.7071 [T]	0.97852
Rhizobium favelukesii LPU83 [T]	0.97759
Rhizobium grahamii CCGE 502 [T]	0.97289
Rhizobium pusense NRCPB10 [T]	0.92716
#Tetra Summary for contigsU204.fa

## Sheet: TCS U204
	Tetra Correlation Search (TCS) against GB database using (https://jspecies.ribohost.com/jspeciesws)
Pos.	Species	Strain	Domain	Phylum	Class	Order	Family	Z-Score
1	Rhizobium indigoferae CCBAU 71042	CCBAU 71042	Bacteria	Proteobacteria	Alphaproteobacteria	Hyphomicrobiales	Rhizobiaceae	0.99977
2	Rhizobium leguminosarum bv. viciae USDA 2370	USDA 2370	Bacteria	Proteobacteria	Alphaproteobacteria	Hyphomicrobiales	Rhizobiaceae	0.99974
3	Rhizobium leguminosarum DSM 106839	DSM 106839	Bacteria	Proteobacteria	Alphaproteobacteria	Hyphomicrobiales	Rhizobiaceae	0.99973
4	Rhizobium leguminosarum bv. viciae USDA 2370	USDA 2370	Bacteria	Proteobacteria	Alphaproteobacteria	Hyphomicrobiales	Rhizobiaceae	0.99971
5	Rhizobium leguminosarum bv. trifolii Rt24.2	Rt24.2	Bacteria	Proteobacteria	Alphaproteobacteria	Hyphomicrobiales	Rhizobiaceae	0.99968
6	Rhizobium gallicum bv. gallicum R602sp	R602sp	Bacteria	Proteobacteria	Alphaproteobacteria	Hyphomicrobiales	Rhizobiaceae	0.99968
7	Rhizobium ruizarguesonis UPM1133	UPM1133	Bacteria	Proteobacteria	Alphaproteobacteria	Hyphomicrobiales	Rhizobiaceae	0.99956
8	Rhizobium sp. WYCCWR10014	WYCCWR10014	Bacteria	Proteobacteria	Alphaproteobacteria	Hyphomicrobiales	Rhizobiaceae	0.99952
9	Rhizobium indicum JKLM 12A2	JKLM 12A2	Bacteria	Proteobacteria	Alphaproteobacteria	Hyphomicrobiales	Rhizobiaceae	0.99944
10	Rhizobium sophorae CCBAU 03386	CCBAU 03386	Bacteria	Proteobacteria	Alphaproteobacteria	Hyphomicrobiales	Rhizobiaceae	0.99941
11	Rhizobium leguminosarum bv. viciae WSM1455	WSM1455	Bacteria	Proteobacteria	Alphaproteobacteria	Hyphomicrobiales	Rhizobiaceae	0.99937
12	Rhizobium leguminosarum bv. trifolii WSM1325	WSM1325	Bacteria	Proteobacteria	Alphaproteobacteria	Hyphomicrobiales	Rhizobiaceae	0.99932
13	Rhizobium laguerreae CECT 8280	CECT 8280	Bacteria	Proteobacteria	Alphaproteobacteria	Hyphomicrobiales	Rhizobiaceae	0.99928
14	Rhizobium laguerreae FB206	FB206	Bacteria	Proteobacteria	Alphaproteobacteria	Hyphomicrobiales	Rhizobiaceae	0.99927
15	Rhizobium leguminosarum bv. viciae 3841	3841	Bacteria	Proteobacteria	Alphaproteobacteria	Hyphomicrobiales	Rhizobiaceae	0.99924
16	Rhizobium leguminosarum Vaf-46	Vaf-46	Bacteria	Proteobacteria	Alphaproteobacteria	Hyphomicrobiales	Rhizobiaceae	0.99918
17	Rhizobium leguminosarum bv. trifolii WSM1689	WSM1689	Bacteria	Proteobacteria	Alphaproteobacteria	Hyphomicrobiales	Rhizobiaceae	0.9991
18	Rhizobium changzhiense WYCCWR 11279	WYCCWR 11279	Bacteria	Proteobacteria	Alphaproteobacteria	Hyphomicrobiales	Rhizobiaceae	0.99903
19	Rhizobium leguminosarum Vaf12	Vaf12	Bacteria	Proteobacteria	Alphaproteobacteria	Hyphomicrobiales	Rhizobiaceae	0.99894
20	Rhizobium leguminosarum Vaf10	Vaf10	Bacteria	Proteobacteria	Alphaproteobacteria	Hyphomicrobiales	Rhizobiaceae	0.99857
21	Rhizobium anhuiense CGMCC 1.12621	CGMCC 1.12621	Bacteria	Proteobacteria	Alphaproteobacteria	Hyphomicrobiales	Rhizobiaceae	0.99857
22	Rhizobium anhuiense CCBAU 23252	CCBAU 23252	Bacteria	Proteobacteria	Alphaproteobacteria	Hyphomicrobiales	Rhizobiaceae	0.99854
23	Rhizobium anhuiense bv. trifolii WYCCWR10015	WYCCWR10015	Bacteria	Proteobacteria	Alphaproteobacteria	Hyphomicrobiales	Rhizobiaceae	0.99827
24	Rhizobium sp. CCGE 510	CCGE 510	Bacteria	Proteobacteria	Alphaproteobacteria	Hyphomicrobiales	Rhizobiaceae	0.99803
25	Rhizobium hidalgonense FH14	FH14	Bacteria	Proteobacteria	Alphaproteobacteria	Hyphomicrobiales	Rhizobiaceae	0.99801
26	Rhizobium hidalgonense FH14	FH14	Bacteria	Proteobacteria	Alphaproteobacteria	Hyphomicrobiales	Rhizobiaceae	0.99801
27	Rhizobium leguminosarum bv. trifolii WSM2012	WSM2012	Bacteria	Proteobacteria	Alphaproteobacteria	Hyphomicrobiales	Rhizobiaceae	0.99792
28	Rhizobium leguminosarum bv. trifolii CB782	CB782	Bacteria	Proteobacteria	Alphaproteobacteria	Hyphomicrobiales	Rhizobiaceae	0.99792
29	Rhizobium leguminosarum bv. trifolii WSM2297	WSM2297	Bacteria	Proteobacteria	Alphaproteobacteria	Hyphomicrobiales	Rhizobiaceae	0.99775
30	Rhizobium fabae DSM 19331	DSM 19331	Bacteria	Proteobacteria	Alphaproteobacteria	Hyphomicrobiales	Rhizobiaceae	0.99762
31	Rhizobium lentis BLR27	BLR27	Bacteria	Proteobacteria	Alphaproteobacteria	Hyphomicrobiales	Rhizobiaceae	0.99756
32	Rhizobium binae BLR195	BLR195	Bacteria	Proteobacteria	Alphaproteobacteria	Hyphomicrobiales	Rhizobiaceae	0.99756
33	Rhizobium binae BLR195	BLR195	Bacteria	Proteobacteria	Alphaproteobacteria	Hyphomicrobiales	Rhizobiaceae	0.99755
34	Rhizobium lentis BLR27	BLR27	Bacteria	Proteobacteria	Alphaproteobacteria	Hyphomicrobiales	Rhizobiaceae	0.99753
35	Rhizobium vallis CCBAU 65647	CCBAU 65647	Bacteria	Proteobacteria	Alphaproteobacteria	Hyphomicrobiales	Rhizobiaceae	0.99751
36	Rhizobium pisi DSM 30132	DSM 30132	Bacteria	Proteobacteria	Alphaproteobacteria	Hyphomicrobiales	Rhizobiaceae	0.99751
37	Rhizobium fabae CCBAU 33202	CCBAU 33202	Bacteria	Proteobacteria	Alphaproteobacteria	Hyphomicrobiales	Rhizobiaceae	0.99735
38	Rhizobium leguminosarum bv. trifolii WSM597	WSM597	Bacteria	Proteobacteria	Alphaproteobacteria	Hyphomicrobiales	Rhizobiaceae	0.99725
39	Rhizobium redzepovicii 18T	18T	Bacteria	Proteobacteria	Alphaproteobacteria	Hyphomicrobiales	Rhizobiaceae	0.99721
40	Rhizobium aethiopicum HBR26	HBR26	Bacteria	Proteobacteria	Alphaproteobacteria	Hyphomicrobiales	Rhizobiaceae	0.99718
41	Rhizobium acidisoli FH23	FH23	Bacteria	Proteobacteria	Alphaproteobacteria	Hyphomicrobiales	Rhizobiaceae	0.99694
42	Rhizobium sp. Pop5	Pop5	Bacteria	Proteobacteria	Alphaproteobacteria	Hyphomicrobiales	Rhizobiaceae	0.99693
43	Rhizobium leguminosarum bv. trifolii WSM2304	WSM2304	Bacteria	Proteobacteria	Alphaproteobacteria	Hyphomicrobiales	Rhizobiaceae	0.99691
44	Rhizobium etli CFN 42	CFN 42	Bacteria	Proteobacteria	Alphaproteobacteria	Hyphomicrobiales	Rhizobiaceae	0.99687
45	Rhizobium bangladeshense BLR175	BLR175	Bacteria	Proteobacteria	Alphaproteobacteria	Hyphomicrobiales	Rhizobiaceae	0.99683
46	Rhizobium bangladeshense BLR175	BLR175	Bacteria	Proteobacteria	Alphaproteobacteria	Hyphomicrobiales	Rhizobiaceae	0.99683
47	Rhizobium ecuadorense CNPSO 671	CNPSO 671	Bacteria	Proteobacteria	Alphaproteobacteria	Hyphomicrobiales	Rhizobiaceae	0.99681
48	Rhizobium etli bv. mimosae str. Mim1	Mim1	Bacteria	Proteobacteria	Alphaproteobacteria	Hyphomicrobiales	Rhizobiaceae	0.9968
49	Rhizobium esperanzae CNPSo 668	CNPSo 668	Bacteria	Proteobacteria	Alphaproteobacteria	Hyphomicrobiales	Rhizobiaceae	0.99671
50	Rhizobium sp. IE4771	IE4771	Bacteria	Proteobacteria	Alphaproteobacteria	Hyphomicrobiales	Rhizobiaceae	0.99666
51	Rhizobium sp. N113	N113	Bacteria	Proteobacteria	Alphaproteobacteria	Hyphomicrobiales	Rhizobiaceae	0.99657
52	Rhizobium sp. N741	N741	Bacteria	Proteobacteria	Alphaproteobacteria	Hyphomicrobiales	Rhizobiaceae	0.99654
53	Rhizobium phaseoli ATCC 14482	ATCC 14482	Bacteria	Proteobacteria	Alphaproteobacteria	Hyphomicrobiales	Rhizobiaceae	0.99645
54	Rhizobium phaseoli Ch24-10	Ch24-10	Bacteria	Proteobacteria	Alphaproteobacteria	Hyphomicrobiales	Rhizobiaceae	0.99643
55	Rhizobium chutanense C5	C5	Bacteria	Proteobacteria	Alphaproteobacteria	Hyphomicrobiales	Rhizobiaceae	0.9964
56	Rhizobium etli CNPAF512	CNPAF512	Bacteria	Proteobacteria	Alphaproteobacteria	Hyphomicrobiales	Rhizobiaceae	0.99637
57	Rhizobium etli CIAT 652	CIAT 652	Bacteria	Proteobacteria	Alphaproteobacteria	Hyphomicrobiales	Rhizobiaceae	0.99622
58	Rhizobium phaseoli N671	N671	Bacteria	Proteobacteria	Alphaproteobacteria	Hyphomicrobiales	Rhizobiaceae	0.99621
59	Rhizobium etli bv. phaseoli str. IE4803	IE4803	Bacteria	Proteobacteria	Alphaproteobacteria	Hyphomicrobiales	Rhizobiaceae	0.9962
60	Rhizobium phaseoli R630	R630	Bacteria	Proteobacteria	Alphaproteobacteria	Hyphomicrobiales	Rhizobiaceae	0.99617
61	Rhizobium sophoriradicis CCBAU 03470	CCBAU 03470	Bacteria	Proteobacteria	Alphaproteobacteria	Hyphomicrobiales	Rhizobiaceae	0.99615
62	Rhizobium leguminosarum bv. phaseoli CCGM1	CCGM1	Bacteria	Proteobacteria	Alphaproteobacteria	Hyphomicrobiales	Rhizobiaceae	0.99611
63	Rhizobium croatiense 13T	13T	Bacteria	Proteobacteria	Alphaproteobacteria	Hyphomicrobiales	Rhizobiaceae	0.99598
64	Rhizobium sp. N941	N941	Bacteria	Proteobacteria	Alphaproteobacteria	Hyphomicrobiales	Rhizobiaceae	0.99525
65	Agrobacterium rhizogenes LMG150	LMG150	Bacteria	Proteobacteria	Alphaproteobacteria	Hyphomicrobiales	Rhizobiaceae	0.98988
66	Agrobacterium radiobacter K84	K84	Bacteria	Proteobacteria	Alphaproteobacteria	Hyphomicrobiales	Rhizobiaceae	0.98986
67	Agrobacterium rhizogenes NBRC 13257	NBRC 13257	Bacteria	Proteobacteria	Alphaproteobacteria	Hyphomicrobiales	Rhizobiaceae	0.9898
68	Agrobacterium rhizogenes ATCC 15834	ATCC 15834	Bacteria	Proteobacteria	Alphaproteobacteria	Hyphomicrobiales	Rhizobiaceae	0.98946
69	Rhizobium sp. AP16	AP16	Bacteria	Proteobacteria	Alphaproteobacteria	Hyphomicrobiales	Rhizobiaceae	0.98902
70	Rhizobium lusitanum P1-7	P1-7	Bacteria	Proteobacteria	Alphaproteobacteria	Hyphomicrobiales	Rhizobiaceae	0.98901
71	Rhizobium jaguaris CCGE525	CCGE525	Bacteria	Proteobacteria	Alphaproteobacteria	Hyphomicrobiales	Rhizobiaceae	0.98889
72	Rhizobium leucaenae USDA 9039	USDA 9039	Bacteria	Proteobacteria	Alphaproteobacteria	Hyphomicrobiales	Rhizobiaceae	0.98648
73	Rhizobium leucaenae USDA 9039 CFN 299	CFN 299	Bacteria	Proteobacteria	Alphaproteobacteria	Hyphomicrobiales	Rhizobiaceae	0.98646
74	Rhizobium freirei PRF 81	PRF 81	Bacteria	Proteobacteria	Alphaproteobacteria	Hyphomicrobiales	Rhizobiaceae	0.9864
75	Ensifer adhaerens SD006	SD006	Bacteria	Proteobacteria	Alphaproteobacteria	Hyphomicrobiales	Rhizobiaceae	0.98502
76	Ensifer sp. Root31	Root31	Bacteria	Proteobacteria	Alphaproteobacteria	Hyphomicrobiales	Rhizobiaceae	0.98466
77	Ensifer sp. Root127	Root127	Bacteria	Proteobacteria	Alphaproteobacteria	Hyphomicrobiales	Rhizobiaceae	0.98453
78	Rhizobium miluonense HAMBI 2971	HAMBI 2971	Bacteria	Proteobacteria	Alphaproteobacteria	Hyphomicrobiales	Rhizobiaceae	0.98444
79	Sinorhizobium sp. Sb3	Sb3	Bacteria	Proteobacteria	Alphaproteobacteria	Hyphomicrobiales	Rhizobiaceae	0.98431
80	Ensifer sp. Root142	Root142	Bacteria	Proteobacteria	Alphaproteobacteria	Hyphomicrobiales	Rhizobiaceae	0.98414
81	Rhizobium giardinii bv. giardinii H152	H152	Bacteria	Proteobacteria	Alphaproteobacteria	Hyphomicrobiales	Rhizobiaceae	0.98394
82	Ensifer sp. Root1252	Root1252	Bacteria	Proteobacteria	Alphaproteobacteria	Hyphomicrobiales	Rhizobiaceae	0.9839
83	Ensifer sp. Root258	Root258	Bacteria	Proteobacteria	Alphaproteobacteria	Hyphomicrobiales	Rhizobiaceae	0.98389
84	Ensifer sp. Root231	Root231	Bacteria	Proteobacteria	Alphaproteobacteria	Hyphomicrobiales	Rhizobiaceae	0.98382
85	Ensifer adhaerens OV14	OV14	Bacteria	Proteobacteria	Alphaproteobacteria	Hyphomicrobiales	Rhizobiaceae	0.98364
86	Rhizobium sp. CF142	CF142	Bacteria	Proteobacteria	Alphaproteobacteria	Hyphomicrobiales	Rhizobiaceae	0.98324
87	Rhizobium multihospitium HAMBI 2975	HAMBI 2975	Bacteria	Proteobacteria	Alphaproteobacteria	Hyphomicrobiales	Rhizobiaceae	0.98268
88	Rhizobium tropici CIAT 899	CIAT 899	Bacteria	Proteobacteria	Alphaproteobacteria	Hyphomicrobiales	Rhizobiaceae	0.98268
89	Ensifer sesbaniae CCBAU 65729	CCBAU 65729	Bacteria	Proteobacteria	Alphaproteobacteria	Hyphomicrobiales	Rhizobiaceae	0.98264
90	Ensifer sp. LC54	LC54	Bacteria	Proteobacteria	Alphaproteobacteria	Hyphomicrobiales	Rhizobiaceae	0.98262
91	Ensifer sp. Root278	Root278	Bacteria	Proteobacteria	Alphaproteobacteria	Hyphomicrobiales	Rhizobiaceae	0.98256
92	Rhizobium viscosum DSM 7307	DSM 7307	Bacteria	Proteobacteria	Alphaproteobacteria	Hyphomicrobiales	Rhizobiaceae	0.98202
93	Rhizobium mongolense USDA 1844	USDA 1844	Bacteria	Proteobacteria	Alphaproteobacteria	Hyphomicrobiales	Rhizobiaceae	0.98198
94	Rhizobium gallicum bv. gallicum R602sp R602	R602	Bacteria	Proteobacteria	Alphaproteobacteria	Hyphomicrobiales	Rhizobiaceae	0.98196
95	Sinorhizobium sp. GL28	GL28	Bacteria	Proteobacteria	Alphaproteobacteria	Hyphomicrobiales	Rhizobiaceae	0.98195
96	Rhizobium azibense 23C2	23C2	Bacteria	Proteobacteria	Alphaproteobacteria	Hyphomicrobiales	Rhizobiaceae	0.98195
97	Rhizobium sp. AC27/96	AC27/96	Bacteria	Proteobacteria	Alphaproteobacteria	Hyphomicrobiales	Rhizobiaceae	0.98186
98	Rhizobium mongolense USDA 1844	USDA 1844	Bacteria	Proteobacteria	Alphaproteobacteria	Hyphomicrobiales	Rhizobiaceae	0.9816
99	Rhizobium sp. YK2	YK2	Bacteria	Proteobacteria	Alphaproteobacteria	Hyphomicrobiales	Rhizobiaceae	0.98054
100	Rhizobium hainanense CCBAU 57015	CCBAU 57015	Bacteria	Proteobacteria	Alphaproteobacteria	Hyphomicrobiales	Rhizobiaceae	0.98046

## Sheet: EZ
OrthoANIu calculation with ezbiocloud database (https://www.ezbiocloud.net/)
	OrthoANIu value (%)
Rhizobium leguminosarum DSM 30141	98
Rhizobium leguminosarum bv. trifolii TA1	93.03
Rhizobium leguminosarum bv. trifolii CC275e	92.98
Rhizobium leguminosarum bv. viciae USDA 2370 [T]	97.65
