# Supplementary material for: Competitiveness and Phylogenetic Relationship of Rhizobial Strains with Different Symbiotic Efficiency in Trifolium repens: Conversion of Parasitic into Non-Parasitic Rhizobia by Natural Symbiotic Gene Transfer
Source: Biology (Basel). 2023 Feb 3;12(2):243. doi: 10.3390/biology12020243 (PMC9953144; doi:10.3390/biology12020243)
Supplement: Supplementary file 1 [file biology-12-00243-s001.zip › Table S2.xlsx]

## Sheet: TCS
	Tetra Correlation Search (TCS) against GB database using (https://jspecies.ribohost.com/jspeciesws)
Pos.	Species	Strain	Domain	Phylum	Class	Order	Family	Z-Score
2	Rhizobium leguminosarum bv. trifolii WSM2304	WSM2304	Bacteria	Proteobacteria	Alphaproteobacteria	Hyphomicrobiales	Rhizobiaceae	0.99972
3	Rhizobium acidisoli FH23	FH23	Bacteria	Proteobacteria	Alphaproteobacteria	Hyphomicrobiales	Rhizobiaceae	0.99971
4	Rhizobium redzepovicii 18T	18T	Bacteria	Proteobacteria	Alphaproteobacteria	Hyphomicrobiales	Rhizobiaceae	0.99955
5	Rhizobium leguminosarum bv. trifolii WSM2297	WSM2297	Bacteria	Proteobacteria	Alphaproteobacteria	Hyphomicrobiales	Rhizobiaceae	0.99947
6	Rhizobium leguminosarum bv. trifolii CB782	CB782	Bacteria	Proteobacteria	Alphaproteobacteria	Hyphomicrobiales	Rhizobiaceae	0.9994
7	Rhizobium ecuadorense CNPSO 671	CNPSO 671	Bacteria	Proteobacteria	Alphaproteobacteria	Hyphomicrobiales	Rhizobiaceae	0.99939
8	Rhizobium leguminosarum bv. trifolii WSM2012	WSM2012	Bacteria	Proteobacteria	Alphaproteobacteria	Hyphomicrobiales	Rhizobiaceae	0.99933
9	Rhizobium hidalgonense FH14	FH14	Bacteria	Proteobacteria	Alphaproteobacteria	Hyphomicrobiales	Rhizobiaceae	0.99929
10	Rhizobium hidalgonense FH14	FH14	Bacteria	Proteobacteria	Alphaproteobacteria	Hyphomicrobiales	Rhizobiaceae	0.99929
11	Rhizobium sp. N941	N941	Bacteria	Proteobacteria	Alphaproteobacteria	Hyphomicrobiales	Rhizobiaceae	0.99904
12	Rhizobium sp. CCGE 510	CCGE 510	Bacteria	Proteobacteria	Alphaproteobacteria	Hyphomicrobiales	Rhizobiaceae	0.99891
13	Rhizobium chutanense C5	C5	Bacteria	Proteobacteria	Alphaproteobacteria	Hyphomicrobiales	Rhizobiaceae	0.99885
14	Rhizobium phaseoli ATCC 14482	ATCC 14482	Bacteria	Proteobacteria	Alphaproteobacteria	Hyphomicrobiales	Rhizobiaceae	0.99855
15	Rhizobium anhuiense CCBAU 23252	CCBAU 23252	Bacteria	Proteobacteria	Alphaproteobacteria	Hyphomicrobiales	Rhizobiaceae	0.99852
16	Rhizobium anhuiense CGMCC 1.12621	CGMCC 1.12621	Bacteria	Proteobacteria	Alphaproteobacteria	Hyphomicrobiales	Rhizobiaceae	0.99851
17	Rhizobium etli bv. phaseoli str. IE4803	IE4803	Bacteria	Proteobacteria	Alphaproteobacteria	Hyphomicrobiales	Rhizobiaceae	0.9984
18	Rhizobium etli CIAT 652	CIAT 652	Bacteria	Proteobacteria	Alphaproteobacteria	Hyphomicrobiales	Rhizobiaceae	0.99838
19	Rhizobium phaseoli Ch24-10	Ch24-10	Bacteria	Proteobacteria	Alphaproteobacteria	Hyphomicrobiales	Rhizobiaceae	0.99838
20	Rhizobium phaseoli R630	R630	Bacteria	Proteobacteria	Alphaproteobacteria	Hyphomicrobiales	Rhizobiaceae	0.99836
21	Rhizobium leguminosarum bv. phaseoli CCGM1	CCGM1	Bacteria	Proteobacteria	Alphaproteobacteria	Hyphomicrobiales	Rhizobiaceae	0.99834
22	Rhizobium sp. IE4771	IE4771	Bacteria	Proteobacteria	Alphaproteobacteria	Hyphomicrobiales	Rhizobiaceae	0.99832
23	Rhizobium etli CNPAF512	CNPAF512	Bacteria	Proteobacteria	Alphaproteobacteria	Hyphomicrobiales	Rhizobiaceae	0.9983
24	Rhizobium anhuiense bv. trifolii WYCCWR10015	WYCCWR10015	Bacteria	Proteobacteria	Alphaproteobacteria	Hyphomicrobiales	Rhizobiaceae	0.99827
25	Rhizobium leguminosarum bv. trifolii WSM1689	WSM1689	Bacteria	Proteobacteria	Alphaproteobacteria	Hyphomicrobiales	Rhizobiaceae	0.99826
26	Rhizobium phaseoli N671	N671	Bacteria	Proteobacteria	Alphaproteobacteria	Hyphomicrobiales	Rhizobiaceae	0.99825
27	Rhizobium changzhiense WYCCWR 11279	WYCCWR 11279	Bacteria	Proteobacteria	Alphaproteobacteria	Hyphomicrobiales	Rhizobiaceae	0.99824
28	Rhizobium binae BLR195	BLR195	Bacteria	Proteobacteria	Alphaproteobacteria	Hyphomicrobiales	Rhizobiaceae	0.99821
29	Rhizobium binae BLR195	BLR195	Bacteria	Proteobacteria	Alphaproteobacteria	Hyphomicrobiales	Rhizobiaceae	0.99821
30	Rhizobium sophoriradicis CCBAU 03470	CCBAU 03470	Bacteria	Proteobacteria	Alphaproteobacteria	Hyphomicrobiales	Rhizobiaceae	0.9982
31	Rhizobium croatiense 13T	13T	Bacteria	Proteobacteria	Alphaproteobacteria	Hyphomicrobiales	Rhizobiaceae	0.99817
32	Rhizobium laguerreae CECT 8280	CECT 8280	Bacteria	Proteobacteria	Alphaproteobacteria	Hyphomicrobiales	Rhizobiaceae	0.99808
33	Rhizobium laguerreae FB206	FB206	Bacteria	Proteobacteria	Alphaproteobacteria	Hyphomicrobiales	Rhizobiaceae	0.99807
34	Rhizobium leguminosarum bv. viciae 3841	3841	Bacteria	Proteobacteria	Alphaproteobacteria	Hyphomicrobiales	Rhizobiaceae	0.99803
35	Rhizobium leguminosarum Vaf12	Vaf12	Bacteria	Proteobacteria	Alphaproteobacteria	Hyphomicrobiales	Rhizobiaceae	0.99802
36	Rhizobium indicum JKLM 12A2	JKLM 12A2	Bacteria	Proteobacteria	Alphaproteobacteria	Hyphomicrobiales	Rhizobiaceae	0.998
37	Rhizobium sophorae CCBAU 03386	CCBAU 03386	Bacteria	Proteobacteria	Alphaproteobacteria	Hyphomicrobiales	Rhizobiaceae	0.998
38	Rhizobium leguminosarum bv. trifolii WSM1325	WSM1325	Bacteria	Proteobacteria	Alphaproteobacteria	Hyphomicrobiales	Rhizobiaceae	0.99794
39	Rhizobium gallicum bv. gallicum R602sp	R602sp	Bacteria	Proteobacteria	Alphaproteobacteria	Hyphomicrobiales	Rhizobiaceae	0.99789
40	Rhizobium sp. N113	N113	Bacteria	Proteobacteria	Alphaproteobacteria	Hyphomicrobiales	Rhizobiaceae	0.99788
41	Rhizobium leguminosarum bv. viciae WSM1455	WSM1455	Bacteria	Proteobacteria	Alphaproteobacteria	Hyphomicrobiales	Rhizobiaceae	0.99785
42	Rhizobium sp. WYCCWR10014	WYCCWR10014	Bacteria	Proteobacteria	Alphaproteobacteria	Hyphomicrobiales	Rhizobiaceae	0.99783
43	Rhizobium leguminosarum Vaf-46	Vaf-46	Bacteria	Proteobacteria	Alphaproteobacteria	Hyphomicrobiales	Rhizobiaceae	0.99781
44	Rhizobium ruizarguesonis UPM1133	UPM1133	Bacteria	Proteobacteria	Alphaproteobacteria	Hyphomicrobiales	Rhizobiaceae	0.9978
45	Rhizobium sp. N741	N741	Bacteria	Proteobacteria	Alphaproteobacteria	Hyphomicrobiales	Rhizobiaceae	0.9978
46	Rhizobium etli CFN 42	CFN 42	Bacteria	Proteobacteria	Alphaproteobacteria	Hyphomicrobiales	Rhizobiaceae	0.99772
47	Rhizobium aethiopicum HBR26	HBR26	Bacteria	Proteobacteria	Alphaproteobacteria	Hyphomicrobiales	Rhizobiaceae	0.99766
48	Rhizobium esperanzae CNPSo 668	CNPSo 668	Bacteria	Proteobacteria	Alphaproteobacteria	Hyphomicrobiales	Rhizobiaceae	0.99763
49	Rhizobium leguminosarum bv. viciae USDA 2370	USDA 2370	Bacteria	Proteobacteria	Alphaproteobacteria	Hyphomicrobiales	Rhizobiaceae	0.99749
50	Rhizobium leguminosarum bv. viciae USDA 2370	USDA 2370	Bacteria	Proteobacteria	Alphaproteobacteria	Hyphomicrobiales	Rhizobiaceae	0.99747
51	Rhizobium leguminosarum DSM 106839	DSM 106839	Bacteria	Proteobacteria	Alphaproteobacteria	Hyphomicrobiales	Rhizobiaceae	0.99746
52	Rhizobium leguminosarum bv. trifolii Rt24.2	Rt24.2	Bacteria	Proteobacteria	Alphaproteobacteria	Hyphomicrobiales	Rhizobiaceae	0.99745
53	Rhizobium etli bv. mimosae str. Mim1	Mim1	Bacteria	Proteobacteria	Alphaproteobacteria	Hyphomicrobiales	Rhizobiaceae	0.99745
54	Rhizobium lentis BLR27	BLR27	Bacteria	Proteobacteria	Alphaproteobacteria	Hyphomicrobiales	Rhizobiaceae	0.99742
55	Rhizobium lentis BLR27	BLR27	Bacteria	Proteobacteria	Alphaproteobacteria	Hyphomicrobiales	Rhizobiaceae	0.99738
56	Rhizobium leguminosarum Vaf10	Vaf10	Bacteria	Proteobacteria	Alphaproteobacteria	Hyphomicrobiales	Rhizobiaceae	0.99735
57	Rhizobium indigoferae CCBAU 71042	CCBAU 71042	Bacteria	Proteobacteria	Alphaproteobacteria	Hyphomicrobiales	Rhizobiaceae	0.9971
58	Rhizobium bangladeshense BLR175	BLR175	Bacteria	Proteobacteria	Alphaproteobacteria	Hyphomicrobiales	Rhizobiaceae	0.99653
59	Rhizobium bangladeshense BLR175	BLR175	Bacteria	Proteobacteria	Alphaproteobacteria	Hyphomicrobiales	Rhizobiaceae	0.99653
60	Rhizobium vallis CCBAU 65647	CCBAU 65647	Bacteria	Proteobacteria	Alphaproteobacteria	Hyphomicrobiales	Rhizobiaceae	0.9965
61	Rhizobium sp. Pop5	Pop5	Bacteria	Proteobacteria	Alphaproteobacteria	Hyphomicrobiales	Rhizobiaceae	0.99602
62	Rhizobium pisi DSM 30132	DSM 30132	Bacteria	Proteobacteria	Alphaproteobacteria	Hyphomicrobiales	Rhizobiaceae	0.99563
63	Rhizobium fabae CCBAU 33202	CCBAU 33202	Bacteria	Proteobacteria	Alphaproteobacteria	Hyphomicrobiales	Rhizobiaceae	0.99555
64	Rhizobium fabae DSM 19331	DSM 19331	Bacteria	Proteobacteria	Alphaproteobacteria	Hyphomicrobiales	Rhizobiaceae	0.9955
65	Agrobacterium rhizogenes LMG150	LMG150	Bacteria	Proteobacteria	Alphaproteobacteria	Hyphomicrobiales	Rhizobiaceae	0.98431
66	Agrobacterium rhizogenes NBRC 13257	NBRC 13257	Bacteria	Proteobacteria	Alphaproteobacteria	Hyphomicrobiales	Rhizobiaceae	0.98424
67	Agrobacterium radiobacter K84	K84	Bacteria	Proteobacteria	Alphaproteobacteria	Hyphomicrobiales	Rhizobiaceae	0.98417
68	Agrobacterium rhizogenes ATCC 15834	ATCC 15834	Bacteria	Proteobacteria	Alphaproteobacteria	Hyphomicrobiales	Rhizobiaceae	0.98374
69	Rhizobium sp. AP16	AP16	Bacteria	Proteobacteria	Alphaproteobacteria	Hyphomicrobiales	Rhizobiaceae	0.98336
70	Rhizobium jaguaris CCGE525	CCGE525	Bacteria	Proteobacteria	Alphaproteobacteria	Hyphomicrobiales	Rhizobiaceae	0.983
71	Rhizobium lusitanum P1-7	P1-7	Bacteria	Proteobacteria	Alphaproteobacteria	Hyphomicrobiales	Rhizobiaceae	0.98257
72	Rhizobium leucaenae USDA 9039	USDA 9039	Bacteria	Proteobacteria	Alphaproteobacteria	Hyphomicrobiales	Rhizobiaceae	0.98192
73	Rhizobium leucaenae USDA 9039 CFN 299	CFN 299	Bacteria	Proteobacteria	Alphaproteobacteria	Hyphomicrobiales	Rhizobiaceae	0.98191
74	Rhizobium freirei PRF 81	PRF 81	Bacteria	Proteobacteria	Alphaproteobacteria	Hyphomicrobiales	Rhizobiaceae	0.98055
75	Ensifer adhaerens SD006	SD006	Bacteria	Proteobacteria	Alphaproteobacteria	Hyphomicrobiales	Rhizobiaceae	0.97844
76	Rhizobium album NS-104	NS-104	Bacteria	Proteobacteria	Alphaproteobacteria	Hyphomicrobiales	Rhizobiaceae	0.97805
77	Sinorhizobium sp. Sb3	Sb3	Bacteria	Proteobacteria	Alphaproteobacteria	Hyphomicrobiales	Rhizobiaceae	0.97773
78	Ensifer sesbaniae CCBAU 65729	CCBAU 65729	Bacteria	Proteobacteria	Alphaproteobacteria	Hyphomicrobiales	Rhizobiaceae	0.97715
79	Ensifer sp. Root31	Root31	Bacteria	Proteobacteria	Alphaproteobacteria	Hyphomicrobiales	Rhizobiaceae	0.97707
80	Rhizobium miluonense HAMBI 2971	HAMBI 2971	Bacteria	Proteobacteria	Alphaproteobacteria	Hyphomicrobiales	Rhizobiaceae	0.97698
81	Ensifer sp. Root127	Root127	Bacteria	Proteobacteria	Alphaproteobacteria	Hyphomicrobiales	Rhizobiaceae	0.97687
82	Rhizobium sp. Root1212	Root1212	Bacteria	Proteobacteria	Alphaproteobacteria	Hyphomicrobiales	Rhizobiaceae	0.97658
83	Rhizobium sp. Root268	Root268	Bacteria	Proteobacteria	Alphaproteobacteria	Hyphomicrobiales	Rhizobiaceae	0.97656
84	Ensifer sp. Root142	Root142	Bacteria	Proteobacteria	Alphaproteobacteria	Hyphomicrobiales	Rhizobiaceae	0.97636
85	Ensifer sp. Root258	Root258	Bacteria	Proteobacteria	Alphaproteobacteria	Hyphomicrobiales	Rhizobiaceae	0.97608
86	Ensifer sp. Root1252	Root1252	Bacteria	Proteobacteria	Alphaproteobacteria	Hyphomicrobiales	Rhizobiaceae	0.97608
87	Ensifer sp. LC54	LC54	Bacteria	Proteobacteria	Alphaproteobacteria	Hyphomicrobiales	Rhizobiaceae	0.97606
88	Ensifer sp. Root278	Root278	Bacteria	Proteobacteria	Alphaproteobacteria	Hyphomicrobiales	Rhizobiaceae	0.97603
89	Ensifer sp. Root231	Root231	Bacteria	Proteobacteria	Alphaproteobacteria	Hyphomicrobiales	Rhizobiaceae	0.97595
90	Ensifer adhaerens OV14	OV14	Bacteria	Proteobacteria	Alphaproteobacteria	Hyphomicrobiales	Rhizobiaceae	0.97593
91	Neorhizobium galegae bv. officinalis bv. officinalis str. HAMBI 1141	HAMBI 1141	Bacteria	Proteobacteria	Alphaproteobacteria	Hyphomicrobiales	Rhizobiaceae	0.97569
92	Rhizobium giardinii bv. giardinii H152	H152	Bacteria	Proteobacteria	Alphaproteobacteria	Hyphomicrobiales	Rhizobiaceae	0.97564
93	Rhizobium multihospitium HAMBI 2975	HAMBI 2975	Bacteria	Proteobacteria	Alphaproteobacteria	Hyphomicrobiales	Rhizobiaceae	0.97532
94	Sinorhizobium sp. GL28	GL28	Bacteria	Proteobacteria	Alphaproteobacteria	Hyphomicrobiales	Rhizobiaceae	0.97525
95	Rhizobium tropici CIAT 899	CIAT 899	Bacteria	Proteobacteria	Alphaproteobacteria	Hyphomicrobiales	Rhizobiaceae	0.97522
96	Neorhizobium galegae bv. orientalis null	null	Bacteria	Proteobacteria	Alphaproteobacteria	Hyphomicrobiales	Rhizobiaceae	0.97506
97	Neorhizobium galegae bv. orientalis str. HAMBI 540	HAMBI 540	Bacteria	Proteobacteria	Alphaproteobacteria	Hyphomicrobiales	Rhizobiaceae	0.97493
98	Sinorhizobium fredii NGR234	NGR234	Bacteria	Proteobacteria	Alphaproteobacteria	Hyphomicrobiales	Rhizobiaceae	0.97477
99	Rhizobium sp. CF142	CF142	Bacteria	Proteobacteria	Alphaproteobacteria	Hyphomicrobiales	Rhizobiaceae	0.97468
100	Sinorhizobium americanum CCGM7	CCGM7	Bacteria	Proteobacteria	Alphaproteobacteria	Hyphomicrobiales	Rhizobiaceae	0.97459

## Sheet: tetra
Statistical analisys of tetranucleotide pattern usage with Jspecies (https://jspecies.ribohost.com/jspeciesws)
Genome	z-score
Rhizobium leguminosarum bv. trifolii WSM2304	0.99972
Rhizobium acidisoli FH23	0.99971
Rhizobium redzepovicii 18T [T]	0.99955
Rhizobium ecuadorense CNPSO 671 [T]	0.99939
Rhizobium phaseoli ATCC 14482 [T]	0.99855
Rhizobium anhuiense CCBAU 23252 [T]	0.99852
Rhizobium leguminosarum bv. phaseoli CCGM1	0.99834
Rhizobium croatiense 13T [T]	0.99817
Rhizobium indicum JKLM 12A2 [T]	0.998
Rhizobium sophorae CCBAU 03386 [T]	0.998
Rhizobium leguminosarum bv. trifolii WSM1325	0.99794
Rhizobium esperanzae CNPSo 668 [T]	0.99763
Rhizobium leguminosarum bv. viciae USDA 2370 [T]	0.99747
Rhizobium indigoferae CCBAU 71042 [T]	0.9971
Rhizobium pisi DSM 30132 [T]	0.99563
Rhizobium fabae CCBAU 33202 [T]	0.99555
Rhizobium favelukesii LPU83 [T]	0.96685
Rhizobium deserti SPY-1 [T]	0.95731
Rhizobium pusense NRCPB10 [T]	0.91918

## Sheet: ANIm
ANIm (for WSM597) calculation with JSpecies (https://jspecies.ribohost.com/jspeciesws)
Genome	ANIm [%]	Aligned [%]	Aligned [bp]	Total [bp]
Rhizobium leguminosarum bv. trifolii WSM2304	97.28	82.57	6303534	7634384
Rhizobium acidisoli FH23	96.68	79.89	6099141	7634384
Rhizobium redzepovicii 18T [T]	94.2	74.57	5693039	7634384
Rhizobium ecuadorense CNPSO 671 [T]	92.19	72.16	5509121	7634384
Rhizobium anhuiense CCBAU 23252 [T]	89.52	67.74	5171603	7634384
Rhizobium leguminosarum bv. viciae USDA 2370 [T]	89.37	68.78	5251007	7634384
Rhizobium indigoferae CCBAU 71042 [T]	89.34	67.49	5152382	7634384
Rhizobium leguminosarum bv. trifolii WSM1325	89.31	65.96	5035474	7634384
Rhizobium sophorae CCBAU 03386 [T]	89.29	65.93	5033502	7634384
Rhizobium indicum JKLM 12A2 [T]	89.28	68.19	5206006	7634384
Rhizobium croatiense 13T [T]	89.19	62.57	4777133	7634384
Rhizobium leguminosarum bv. phaseoli CCGM1	89.03	64.75	4943488	7634384
Rhizobium phaseoli ATCC 14482 [T]	89.03	64.05	4889769	7634384
Rhizobium fabae CCBAU 33202 [T]	88.54	61.85	4721663	7634384
Rhizobium pisi DSM 30132 [T]	88.54	61.7	4710275	7634384
Rhizobium esperanzae CNPSo 668 [T]	88.39	60.51	4619679	7634384
Rhizobium favelukesii LPU83 [T]	84.55	23.05	1760006	7634384
Rhizobium deserti SPY-1 [T]	83.82	8.13	620754	7634384
Rhizobium pusense NRCPB10 [T]	83.8	8.34	636530	7634384

## Sheet: ANIb
ANIm (for WSM597) calculation with JSpecies (https://jspecies.ribohost.com/jspeciesws)
Genome	ANIb [%]	Aligned [%]	Aligned [bp]	Total [bp]
Rhizobium leguminosarum bv. trifolii WSM2304	96.32	81.71	6238183	7634384
Rhizobium acidisoli FH23	95.23	79.91	6100297	7634384
Rhizobium redzepovicii 18T [T]	92.72	74.13	5658998	7634384
Rhizobium ecuadorense CNPSO 671 [T]	90.48	71.12	5429952	7634384
Rhizobium anhuiense CCBAU 23252 [T]	87.44	68.69	5244082	7634384
Rhizobium indigoferae CCBAU 71042 [T]	87.29	67.56	5157608	7634384
Rhizobium leguminosarum bv. viciae USDA 2370 [T]	87.26	69.49	5305232	7634384
Rhizobium indicum JKLM 12A2 [T]	87.16	68.84	5255629	7634384
Rhizobium sophorae CCBAU 03386 [T]	87.08	66.81	5100335	7634384
Rhizobium leguminosarum bv. trifolii WSM1325	87.02	67.16	5127010	7634384
Rhizobium leguminosarum bv. phaseoli CCGM1	86.68	66.91	5108385	7634384
Rhizobium croatiense 13T [T]	86.63	64.8	4947103	7634384
Rhizobium phaseoli ATCC 14482 [T]	86.63	66.17	5051591	7634384
Rhizobium pisi DSM 30132 [T]	86.21	63.63	4857422	7634384
Rhizobium fabae CCBAU 33202 [T]	86.2	64.04	4888920	7634384
Rhizobium esperanzae CNPSo 668 [T]	85.88	63.19	4824245	7634384
Rhizobium favelukesii LPU83 [T]	77.29	49.83	3804316	7634384
Rhizobium deserti SPY-1 [T]	73.07	33.13	2529632	7634384
Rhizobium pusense NRCPB10 [T]	72.83	34.92	2666098	7634384
